# Supplementary material
Source: publisher figshare collection journal article supplement (https://frontiersin.figshare.com/ndownloader/files/11277338)
Supplement: Supplementary file [file 11277338]

Supplementary Figure 2

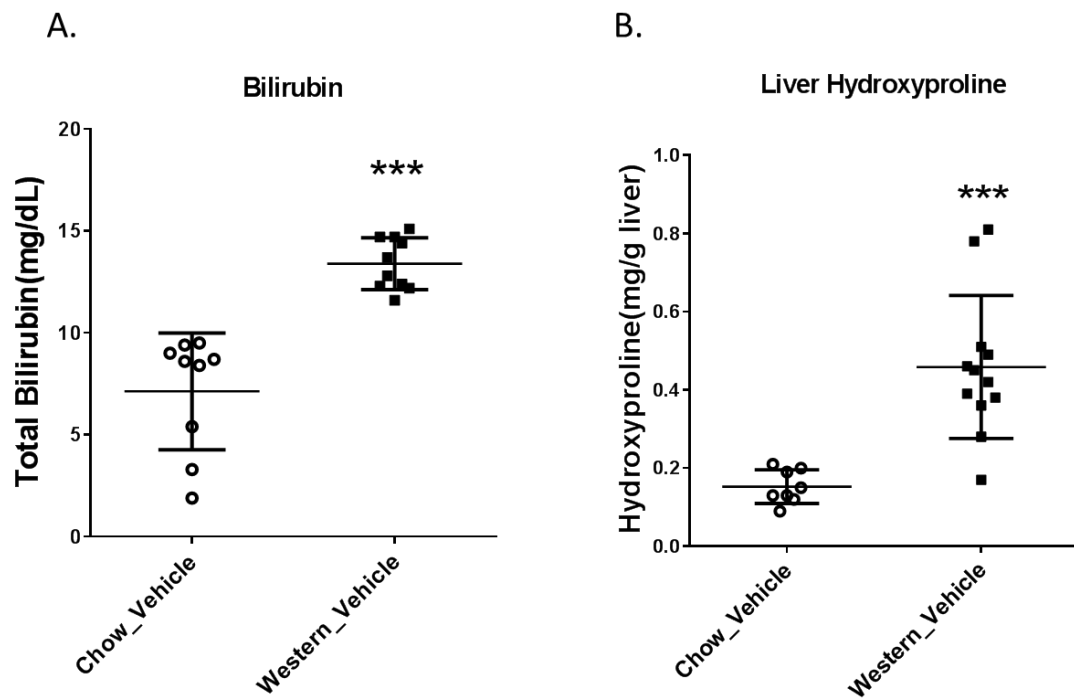

Plasma bilirubin and liver hydroxyproline between Chow diet and Western diet. Both increased significantly in Western diet condition compared to Chow diet control.

Male C57BL/6J mice were fed western diet as described in panel A of Figure 1 for 150 days.

\*\*\*P<0.001 by t-test in GraphPad Prism.
